# Supplementary material
Source: publisher figshare collection journal article supplement (https://frontiersin.figshare.com/ndownloader/files/31653524)
Supplement: Supplementary file 1 [file 31653524]

**Supplementary table 5. Effects of demographic variables on cassava productivity**

| **Variables** | **N** | **Mean (benefit/ha)** | **Std. Deviation** | **Std. Error** | **95%CI for Mean** | | **F** | **ANOVA** |
| --- | --- | --- | --- | --- | --- | --- | --- | --- |
| **Lower** | **Upper** | **p value** |
| **Districts** |  |  |  |  |  |  |  |  |
| Muhanga | 10 | 563.06 | 155.51 | 49.18 | 451.81 | 674.31 | 6.95 | **<0.001** |
| Gisagara | 10 | 574.44 | 90.19 | 28.52 | 509.92 | 638.95 |  |  |
| Nyanza | 10 | 562.33 | 176.32 | 55.76 | 436.20 | 688.47 |  |  |
| Ruhango | 10 | 629.27 | 118.41 | 37.44 | 544.56 | 713.98 |  |  |
| Kamonyi | 10 | 602.90 | 126.95 | 40.15 | 512.09 | 693.72 |  |  |
| Bugesera | 10 | 601.63 | 58.08 | 18.37 | 560.09 | 643.18 |  |  |
| Kirehe | 10 | 625.06 | 94.90 | 30.01 | 557.16 | 692.95 |  |  |
| Ngoma | 10 | 588.40 | 64.88 | 20.52 | 541.98 | 634.81 |  |  |
| Kayonza | 10 | 539.21 | 138.46 | 43.79 | 440.16 | 638.26 |  |  |
| Gakenke | 10 | 334.17 | 76.21 | 24.10 | 279.66 | 388.69 |  |  |
| Nyamasheke | 10 | 359.17 | 93.68 | 29.63 | 292.15 | 426.18 |  |  |
| Nyagatare | 10 | 597.86 | 97.55 | 30.85 | 528.08 | 667.64 |  |  |
| Gatsibo | 10 | 540.87 | 102.51 | 32.42 | 467.54 | 614.20 |  |  |
| **Gender** |  |  |  |  |  |  |  |  |
| Male | 84 | 551.35 | 139.05 | 15.17 | 521.18 | 581.53 | 0.17 | 0.679 |
| Female | 46 | 540.65 | 142.90 | 21.07 | 498.22 | 583.09 |  |  |
| **Marital status** | |  |  |  |  |  |  |  |
| Married | 87 | 541.59 | 146.61 | 15.72 | 510.34 | 572.83 | 0.70 | 0.499 |
| Single | 25 | 577.08 | 112.98 | 22.60 | 530.45 | 623.72 |  |  |
| Widow/er | 18 | 535.48 | 142.41 | 33.57 | 464.66 | 606.30 |  |  |
| **Education level** | |  |  |  |  |  |  |  |
| Illiterate | 23 | 486.12 | 150.13 | 31.30 | 421.20 | 551.04 | 5.03 | **0.008** |
| Primary | 94 | 550.60 | 136.54 | 14.08 | 522.64 | 578.57 |  |  |
| Secondary | 13 | 634.35 | 96.55 | 26.78 | 576.00 | 692.69 |  |  |
| **Farmers category** | |  |  |  |  |  |  |  |
| Individual Farmers | 76 | 478.97 | 131.61 | 15.10 | 448.89 | 509.04 | 66.16 | **<0.001** |
| Cooperative | 54 | 644.12 | 83.22 | 11.32 | 621.41 | 666.83 |  |  |
| *Significant at p<0.05 bolded; Std: Standard; CI: Confidence Interval ; F: F test for continuous outcome | | | | | | | | |
